# Supplementary material for: No Chance to Survive: Mo-CBP3-PepII Synthetic Peptide Acts on Cryptococcus neoformans by Multiple Mechanisms of Action
Source: MDPI journal article supplement (doi:10.3390/antibiotics12020378), 2023-02-12
Supplement: s1 [file s1]

## Supplementary Table S1 – Unique proteins identified in the DMSO group by ESI-LC-MS/MS

| Protein Name                                                             | ID (Uniprot) | Organism Reference              | Cellular Compartment         |
|--------------------------------------------------------------------------|--------------|---------------------------------|------------------------------|
| <b><u>Transport</u></b>                                                  |              |                                 |                              |
| Succinate dehydrogenase [ubiquinone] cytochrome b subunit, mitochondrial | P33421       | <i>Saccharomyces cerevisiae</i> | Mitochondrion inner membrane |
| Anion/proton exchange transporter GEF1                                   | P37020       | <i>Saccharomyces cerevisiae</i> | Golgi apparatus membrane     |
| Sodium transport ATPase 1                                                | P13587       | <i>Saccharomyces cerevisiae</i> | Cell membrane                |
| Vacuolar protein sorting-associated protein 16                           | Q96QK1       | <i>Saccharomyces cerevisiae</i> | Vacuole                      |
| V-type proton ATPase catalytic subunit A                                 | P32563       | <i>Saccharomyces cerevisiae</i> | Vacuole membrane             |
| Protein CASP                                                             | P34237       | <i>Saccharomyces cerevisiae</i> | Golgi apparatus membrane     |
| Exportin-1                                                               | P30822       | <i>Saccharomyces cerevisiae</i> | Cytoplasm                    |
| Na(+)/H(+) antiporter                                                    | B3LT99       | <i>Saccharomyces cerevisiae</i> | Membrane                     |
| ATP-dependent permease AUS1                                              | Q08409       | <i>Saccharomyces cerevisiae</i> | Membrane                     |
| Histidine permease                                                       | P06775       | <i>Saccharomyces cerevisiae</i> | Membrane                     |
| ATPase GET3                                                              | Q12154       | <i>Saccharomyces cerevisiae</i> | Cytoplasm                    |
| Protein SLY1                                                             | P22213       | <i>Saccharomyces cerevisiae</i> | Cytoplasm                    |
| Ferric reductase transmembrane component 5                               | Q12473       | <i>Saccharomyces cerevisiae</i> | Cytoplasm                    |

|                                                                |            |                                  |                                |
|----------------------------------------------------------------|------------|----------------------------------|--------------------------------|
| Vacuolar membrane-associated protein IML1                      | P47170     | <i>Saccharomyces cerevisiae</i>  | Cytoplasm                      |
| Magnesium transporter                                          | W9KFF0     | <i>Fusarium oxysporum</i>        | Mitochondrion inner membrane   |
| RanBD1 domain-containing protein                               | A0A0J9UT92 | <i>Fusarium oxysporum</i>        | Nucleus                        |
| Bifunctional cytochrome P450/<br>NADPH--P450 reductase         | Q9Y8G7     | <i>Fusarium oxysporum</i>        | Cytoplasm                      |
| GPI inositol-deacylase                                         | Q5AYC8     | <i>Emericella nidulans</i>       | Endoplasmic reticulum membrane |
| Serine/threonine-protein kinase<br>KIN82                       | P25341     | <i>Saccharomyces cerevisiae</i>  | Cytoplasm                      |
| Biogenesis of lysosome-related<br>organelles complex 1 subunit | Q75AC2     | <i>Ashbya gossypii</i>           | Cytoplasmic vesicle            |
| Mitochondrial inner membrane<br>magnesium transporter          | Q4I298     | <i>Gibberella zeae</i>           | Mitochondrion inner membrane   |
| Nuclear distribution protein nudE<br>homolog 1                 | Q4P0N6     | <i>Ustilago maydis</i>           | Cytoplasm                      |
| Pheromone-regulated membrane<br>protein 9                      | P39551     | <i>Saccharomyces cerevisiae</i>  | Membrane                       |
| Nucleoporin NUP56                                              | G0S8I1     | <i>Chaetomium thermophilum</i>   | Nuclear pore complex           |
| Polyamine transporter 2                                        | P53283     | <i>Saccharomyces cerevisiae</i>  | Membrane                       |
| Nuclear protein localization protein 4                         | Q6BRJ9     | <i>Debaryomyces hansenii</i>     | Cytoplasm                      |
| Vacuolar protein sorting/targeting protein 10                  | Q5AS50     | <i>Emericella nidulans</i>       | Golgi apparatus                |
| Mechanosensitive ion channel protein Msy1                      | O74839     | <i>Schizosaccharomyces pombe</i> | Endoplasmic reticulum membrane |

|                                   |        |                                  |                                |
|-----------------------------------|--------|----------------------------------|--------------------------------|
| COPII coat assembly protein SEC16 | Q6CEV2 | <i>Yarrowia lipolytica</i>       | Endoplasmic reticulum membrane |
| Mitochondrial glycine transporter | A3M019 | <i>Scheffersomyces stipites</i>  | Mitochondrion inner membrane   |
| GTP-binding protein gtr1          | O74824 | <i>Schizosaccharomyces pombe</i> | Vacuole membrane               |
| V-type proton ATPase subunit a    | Q01290 | <i>Neurospora crassa</i>         | Vacuole membrane               |
| Phosphate metabolism protein 7    | Q12252 | <i>Saccharomyces cerevisiae</i>  | Membrane                       |

**Cell Function and Structure**

|                                                   |        |                                 |                              |
|---------------------------------------------------|--------|---------------------------------|------------------------------|
| Nuclear migration protein NUM1                    | Q00402 | <i>Saccharomyces cerevisiae</i> | Bud tip                      |
| Peroxisomal ATPase PEX6                           | P33760 | <i>Saccharomyces cerevisiae</i> | Peroxisome membrane          |
| Killer toxin-resistance protein 5                 | P22023 | <i>Saccharomyces cerevisiae</i> | Endoplasmic reticulum        |
| Condensin complex subunit 3                       | Q06680 | <i>Saccharomyces cerevisiae</i> | Nucleus                      |
| Altered inheritance of mitochondria<br>protein 20 | P40451 | <i>Saccharomyces cerevisiae</i> | Vacuole membrane             |
| GTPase-interacting component 2                    | P38785 | <i>Saccharomyces cerevisiae</i> | Bud neck                     |
| Non-SCF-type F-box protein ROY1                   | Q04847 | <i>Saccharomyces cerevisiae</i> | Cytoplasm                    |
| MICOS complex subunit MIC19                       | P43594 | <i>Saccharomyces cerevisiae</i> | Mitochondrion inner membrane |
| Nucleoporin ASM4                                  | Q05166 | <i>Saccharomyces cerevisiae</i> | Nucleus                      |
| HMG2-induced ER-remodeling protein 1              | Q12276 | <i>Saccharomyces cerevisiae</i> | Cytoplasm                    |
| Morphogenesis-related protein MSB1                | P21339 | <i>Saccharomyces cerevisiae</i> | Cellular bud neck            |

|                                                 |            |                                  |                       |
|-------------------------------------------------|------------|----------------------------------|-----------------------|
| 1,3-beta-glucan synthase component FKS1         | P38631     | <i>Saccharomyces cerevisiae</i>  | Mitochondrion         |
| Nuclear fusion protein BIK1                     | P11709     | <i>Saccharomyces cerevisiae</i>  | Cytoplasm             |
| Cell division control protein 48                | P25694     | <i>Saccharomyces cerevisiae</i>  | Endoplasmic reticulum |
| Midasin                                         | A0A2H3T3C5 | <i>Fusarium oxysporum</i>        | Nucleus               |
| Dynein heavy chain, cytoplasmic                 | A0A0D2XQR5 | <i>Fusarium oxysporum</i>        | Cytoplasm             |
| Dynamin-type G domain-containing protein        | A0A2H3STJ2 | <i>Fusarium oxysporum</i>        | Nucleus/Cytoplasm     |
| Spindle pole body component                     | A0A0D2XX36 | <i>Fusarium oxysporum</i>        | Cytoplasm             |
| Protein sts5                                    | O74454     | <i>Saccharomyces pombe</i>       | Cytoplasm             |
| Kinesin-like protein bimC                       | P17120     | <i>Emericella nidulans</i>       | Cytoplasm             |
| Myosin-1                                        | A7TDZ8     | <i>Vanderwaltozyma polyspora</i> | Cytoplasm             |
| Actin cytoskeleton-regulatory complex protein E | L7IIY8     | <i>Magnaporthe oryzae</i>        | Membrane              |
| Vacuolar protein sorting-associated protein 3   | P23643     | <i>Saccharomyces cerevisiae</i>  | Cytoplasm             |
| Chitin deacetylase 3                            | P82476     | <i>Cryptococcus neoformans</i>   | Membrane              |
| Actin-regulating kinase PRK1                    | Q5A961     | <i>Candida albicans</i>          | Cytoplasm             |
| Karyogamy meiotic segregation protein 1         | P87245     | <i>Schizosaccharomyces pombe</i> | Cytoplasm             |
| Target of rapamycin complex                     | O74184     | <i>Schizosaccharomyces pombe</i> | Cytoplasm             |

|                                                              |        |                                  |                              |
|--------------------------------------------------------------|--------|----------------------------------|------------------------------|
| subunit wat1                                                 |        |                                  |                              |
| ATP-dependent DNA helicase CHL1                              | Q750G3 | <i>Ashbya gossypii</i>           | Nucleus                      |
| Separin                                                      | P18296 | <i>Schizosaccharomyces pombe</i> | Nucleus                      |
| <b><u>Energetic metabolism</u></b>                           |        |                                  |                              |
| ATP synthase subunit d, mitochondrial                        | P30902 | <i>Saccharomyces cerevisiae</i>  | Mitochondrion inner membrane |
| Glyceraldehyde-3-phosphate dehydrogenase 2                   | P00358 | <i>Saccharomyces cerevisiae</i>  | Cytoplasm                    |
| 6-phosphogluconate dehydrogenase, decarboxylating 1          | P38720 | <i>Saccharomyces cerevisiae</i>  | Cytoplasm                    |
| FAD-linked oxidoreductase chry5                              | I1S3L1 | <i>Gibberella zeae</i>           | Mitochondrion                |
| D-2-hydroxyglutarate—pyruvate transhydrogenase DLD3          | P39976 | <i>Saccharomyces cerevisiae</i>  | Cytoplasm                    |
| NADH-ubiquinone oxidoreductase 49 kDa subunit, mitochondrial | P22142 | <i>Neurospora crassa</i>         | Mitochondrion inner membrane |
| Cytochrome c oxidase assembly protein COX16, mitochondrial   | Q4I8P5 | <i>Gibberella zeae</i>           | Mitochondrion inner membrane |
| <b><u>Protein Folding and metabolism</u></b>                 |        |                                  |                              |
| 26S proteasome regulatory subunit RPN1                       | P38764 | <i>Saccharomyces cerevisiae</i>  | Cytoplasm                    |
| Elongation factor 2                                          | P32324 | <i>Saccharomyces cerevisiae</i>  | Cytoplasm                    |
| 26S proteasome regulatory subunit RPN5                       | Q12250 | <i>Saccharomyces cerevisiae</i>  | Proteasome                   |

|                                                             |            |                                 |                                |
|-------------------------------------------------------------|------------|---------------------------------|--------------------------------|
| Tyrosine-protein phosphatase 3                              | P40048     | <i>Saccharomyces cerevisiae</i> | Cytoplasm                      |
| U3 small nucleolar RNA-associated protein MPP10             | P47083     | <i>Saccharomyces cerevisiae</i> | Nucleus                        |
| ERAD-associated E3 ubiquitin-protein ligase component HRD3  | P47083     | <i>Saccharomyces cerevisiae</i> | Endoplasmatic reticulum        |
| Chromosome instability protein 1                            | P40987     | <i>Saccharomyces cerevisiae</i> | Endoplasmatic reticulum        |
| Kexin                                                       | P13134     | <i>Saccharomyces cerevisiae</i> | Golgi apparatus                |
| Peptide-N(4)-(N-acetyl-beta-glucosaminy) asparagine amidase | Q02890     | <i>Saccharomyces cerevisiae</i> | Cytoplasm                      |
| Mitochondrial chaperone BCS1                                | P32839     | <i>Saccharomyces cerevisiae</i> | Cytoplasm                      |
| Serine/threonine-protein kinase AKL1                        | P38080     | <i>Saccharomyces cerevisiae</i> | Cellular bud neck              |
| ER membrane protein complex subunit 6                       | P25574     | <i>Saccharomyces cerevisiae</i> | Endoplasmic reticulum membrane |
| Protein CSF1                                                | Q12150     | <i>Saccharomyces cerevisiae</i> | Membrane                       |
| Assembly chaperone of RPL4                                  | Q03771     | <i>Saccharomyces cerevisiae</i> | Cytoplasm                      |
| Protein TMA108                                              | P40462     | <i>Saccharomyces cerevisiae</i> | Cytoplasm                      |
| Protein ASI1                                                | P53895     | <i>Saccharomyces cerevisiae</i> | Nucleus inner membrane         |
| F-box protein YLR352W                                       | Q06479     | <i>Saccharomyces cerevisiae</i> | SCF ubiquitin ligase complex   |
| Peptide hydrolase                                           | X0CEB5     | <i>Fusarium oxysporum</i>       | Mitochondrion                  |
| AAA domain-containing protein                               | A0A0D2Y4N3 | <i>Fusarium oxysporum</i>       | Nucleus                        |

|                                                         |            |                                   |                                |
|---------------------------------------------------------|------------|-----------------------------------|--------------------------------|
| TYR_PHOSPHATASE_2<br>domain-containing protein          | A0A6M7ZMH6 | <i>Fusarium oxysporum</i>         | Cytoplasm                      |
| Peptidase_M14 domain-<br>containing protein             | W9KWL0     | <i>Fusarium oxysporum</i>         | Extracellular region           |
| Protein kinase domain-<br>containing protein            | A0A0D2XQE2 | <i>Fusarium oxysporum</i>         | Nucleus                        |
| UBA_e1_C domain-<br>containing protein                  | F9FV89     | <i>Fusarium oxysporum</i>         | Cytoplasm                      |
| Clustered mitochondria protein<br>homolog               | A0A2H3TIH9 | <i>Fusarium oxysporum</i>         | Cytoplasm                      |
| GPI ethanolamine phosphate<br>transferase 2             | A0A6M7ZB90 | <i>Fusarium oxysporum</i>         | Endoplasmic reticulum membrane |
| 5-aminolevulinate synthase                              | A0A0D2XE20 | <i>Fusarium oxysporum</i>         | Mitochondrion                  |
| Eukaryotic translation initiation<br>factor 3 subunit M | Q4P0P0     | <i>Ustilago maydis</i>            | Cytoplasm                      |
| Protein rot1                                            | A6S3W1     | <i>Botryotinia fuckeliana</i>     | Endoplasmic reticulum membrane |
| Protein SUE1, mitochondrial                             | Q06524     | <i>Saccharomyces cerevisiae</i>   | Mitochondrion                  |
| Neutral protease 2 homolog<br>MGG_10927                 | E3QWD3     | <i>Colletotrichum graminicola</i> | Secreted                       |
| Uba3-binding protein but2                               | P87167     | <i>Schizosaccharomyces pombe</i>  | Nucleus                        |
| Ubiquinone biosynthesis protein<br>coq4, mitochondrial  | B6QTE1     | <i>Talaromyces marneffe</i>       | Mitochondrion inner membrane   |

|                                                              |        |                               |           |
|--------------------------------------------------------------|--------|-------------------------------|-----------|
| Eukaryotic translation initiation factor 3 subunit K         | Q1E6D3 | <i>Coccidioides immitis</i>   | Cytoplasm |
| 7-dimethylallyltryptophan synthase                           | Q4WYG3 | <i>Neosartorya fumigata</i>   | Cytoplasm |
| N-(5-amino-5-carboxypentanoyl)-L-cysteinyl-D-valine synthase | P27742 | <i>Emmericella nidulans</i>   | Cytoplasm |
| Methionine aminopeptidase 2-2                                | B6QD96 | <i>Talaromyces marneffei</i>  | Cytoplasm |
| Carboxypeptidase Y homolog A                                 | C5P212 | <i>Coccidioides posadasii</i> | Vacuole   |

**DNA and RNA binding**

|                                                                  |        |                                 |               |
|------------------------------------------------------------------|--------|---------------------------------|---------------|
| tRNA (guanosine(18)-2'-O)-methyltransferase                      | P38238 | <i>Saccharomyces cerevisiae</i> | Cytoplasm     |
| Transposon Ty3-G Gag-Pol polyprotein                             | Q12173 | <i>Saccharomyces cerevisiae</i> | Cytoplasm     |
| Transcription elongation factor SPT5                             | P27692 | <i>Saccharomyces cerevisiae</i> | Nucleus       |
| 54S ribosomal protein L49, mitochondrial                         | P40858 | <i>Saccharomyces cerevisiae</i> | Mitochondrion |
| Nuclear localization sequence-binding protein                    | P27476 | <i>Saccharomyces cerevisiae</i> | Nucleus       |
| Mediator of RNA polymerase II transcription subunit 15           | P32569 | <i>Saccharomyces cerevisiae</i> | Nucleus       |
| RNA cytidine acetyltransferase                                   | P53914 | <i>Saccharomyces cerevisiae</i> | Nucleus       |
| Y' element ATP-dependent helicase protein 1 copy 1               | O13559 | <i>Saccharomyces cerevisiae</i> | Cytoplasm     |
| Pre-mRNA-splicing factor ATP-dependent RNA helicase-like protein | P20095 | <i>Saccharomyces cerevisiae</i> | Nucleus       |
| Chromosome transmission fidelity                                 | P49956 | <i>Saccharomyces cerevisiae</i> | Nucleus       |



|                                                      |            |                                 |                           |
|------------------------------------------------------|------------|---------------------------------|---------------------------|
| protein 18                                           |            |                                 |                           |
| 25S rRNA (adenine(645)-N(1))-Methyltransferase       | P38961     | <i>Saccharomyces cerevisiae</i> | Nucleus                   |
| DNA replication ATP-dependent helicase/nuclease DNA2 | P38859     | <i>Saccharomyces cerevisiae</i> | Nucleus                   |
| Ribonuclease P protein subunit RPR2                  | P40571     | <i>Saccharomyces cerevisiae</i> | Nucleus                   |
| DNA-directed RNA polymerase subunit                  | A0A8J5TW36 | <i>Saccharomyces cerevisiae</i> | Nucleus                   |
| Zn(2)-C6 fungal-type domain-containing protein       | X0CN47     | <i>Fusarium oxysporum</i>       | Nucleus                   |
| Fungal_trans domain-containing protein               | W9JP90     | <i>Fusarium oxysporum</i>       | Nucleus                   |
| 40S ribosomal protein S1                             | W9J4B8     | <i>Fusarium oxysporum</i>       | Cytoplasm                 |
| RNA helicase                                         | A0A420QQN4 | <i>Fusarium oxysporum</i>       | Ribonucleoprotein complex |
| 54S ribosomal protein L31, mitochondrial             | A0A6M7ZGN8 | <i>Fusarium oxysporum</i>       | Mitochondrion             |
| Small nuclear ribonucleoprotein Sm D2                | W9J1T5     | <i>Fusarium oxysporum</i>       | Nucleus                   |
| U3 small nucleolar RNA-associated protein 10         | W9KN02     | <i>Fusarium oxysporum</i>       | Nucleus                   |
| DNA polymerase gamma                                 | P15801     | <i>Saccharomyces cerevisiae</i> | Mitochondrion             |
| 54S ribosomal protein YmL6, Mitochondrial            | P51998     | <i>Saccharomyces cerevisiae</i> | Mitochondrion             |

|                                               |        |                                  |                              |
|-----------------------------------------------|--------|----------------------------------|------------------------------|
| GTP:AMP phosphotransferase,<br>Mitochondrial  | P26364 | <i>Saccharomyces cerevisiae</i>  | Mitochondrion matrix         |
| ATPase synthesis protein 25,<br>mitochondrial | A1DIN7 | <i>Neosartorya fischeri</i>      | Mitochondrion inner membrane |
| RNA exonuclease 3                             | Q4WYA1 | <i>Neosartorya fumigata</i>      | Nucleus                      |
| Cytoplasmic tRNA 2-<br>thiolation protein 1   | Q5AML2 | <i>Candida albicans</i>          | Cytoplasm                    |
| DNA (cytosine-5-)-<br>methyltransferase DMT5  | G2WR64 | <i>Verticillium dahliae</i>      | Nucleus                      |
| Transcription elongation<br>factor SPT5       | P0CR71 | <i>Cryptococcus neoformans</i>   | Nucleus                      |
| ATP-dependent RNA<br>helicase DBP7            | P0CQ95 | <i>Cryptococcus neoformans</i>   | Nucleus                      |
| Protein pyrABCN                               | Q08548 | <i>Emericella nidulans</i>       | Cytoplasm                    |
| ATPase synthesis protein<br>25, mitochondrial | Q09726 | <i>Schizosaccharomyces pombe</i> | Mitochondrion inner membrane |
| Crossover junction<br>endonuclease MUS81      | Q04149 | <i>Saccharomyces cerevisiae</i>  | Nucleus                      |
| Nonsense-mediated mRNA decay protein 2        | P38798 | <i>Saccharomyces cerevisiae</i>  | Cytoplasm                    |
| Endoribonuclease YSH1                         | Q4PEJ3 | <i>Ustilago maydis</i>           | Nucleus                      |
| mRNA-capping enzyme subunit alpha             | Q01159 | <i>Saccharomyces cerevisiae</i>  | Nucleus                      |
| Protein BFR2                                  | Q6FSD4 | <i>Candida glabrata</i>          | Nucleus                      |

### Lipid Metabolism

|                                                             |            |                                 |                                |
|-------------------------------------------------------------|------------|---------------------------------|--------------------------------|
| Lysophospholipid acyltransferase                            | Q08548     | <i>Saccharomyces cerevisiae</i> | Endoplasmic reticulum membrane |
| Oxysterol-binding protein homolog 3                         | P38713     | <i>Saccharomyces cerevisiae</i> | Cytoplasm                      |
| 1-phosphatidylinositol 4,5-bisphosphate phosphodiesterase 1 | P32383     | <i>Fusarium oxysporum</i>       | Chromosome, centromeric region |
| Inositol-3-phosphate synthase                               | P11986     | <i>Saccharomyces cerevisiae</i> | Cytoplasm                      |
| Phosphatidyl-N-methylethanolamine N-methyltransferase       | P05375     | <i>Saccharomyces cerevisiae</i> | Endoplasmic reticulum membrane |
| Sphingosine-1-phosphate lyase                               | Q05567     | <i>Saccharomyces cerevisiae</i> | Endoplasmic reticulum membrane |
| Cardiolipin synthase (CMP-forming)                          | Q07560     | <i>Saccharomyces cerevisiae</i> | Mitochondrion inner membrane   |
| Carrier domain-containing protein                           | A0A420REA3 | <i>Saccharomyces cerevisiae</i> | Endoplasmic reticulum          |
| NADPH--cytochrome P450 reductase                            | A0A3L6P0D2 | <i>Fusarium oxysporum</i>       | Endoplasmic reticulum          |
| GP-PDE domain-containing protein                            | A0A8H4ZPR7 | <i>Fusarium oxysporum</i>       | Nucleus                        |
| Phosphatidylethanolamine N-methyltransferase                | C5GN10     | <i>Ajellomyces dermatitidis</i> | Endoplasmic reticulum membrane |
| O-acyltransferase ausQ                                      | A0A1U8QLK0 | <i>Emericella nidulans</i>      | Nucleus                        |
| Lipoyl synthase, mitochondrial                              | A3GGJ5     | <i>Scheffersomyces stipitis</i> | Mitochondrion                  |
| Lipase 5                                                    | Q9P8W0     | <i>Candida albicans</i>         | Secreted                       |
| Lovastatin diketide                                         | Q9Y7D5     | <i>Aspergillus terreus</i>      | Unknown                        |

synthase lovF

|                                                     |            |                                 |               |
|-----------------------------------------------------|------------|---------------------------------|---------------|
| Increased rDNA silencing<br>Protein 4               | Q6FJW0     | <i>Candida glabrata</i>         | Nucleus       |
| 3-hydroxy-3-methylglutaryl-<br>coenzyme A reductase | B2KX91     | <i>Ganoderma lucidum</i>        | Nucleus       |
| Acyl-protein thioesterase 1                         | Q12354     | <i>Saccharomyces cerevisiae</i> | Cytoplasm     |
| Hydroxymethylglutaryl-<br>CoA synthase              | K7PL94     | <i>Ganoderma lucidum</i>        | Cytoplasm     |
| Lipoyl synthase, mitochondrial                      | P0CH68     | <i>Candida albicans</i>         | Mitochondrion |
| FAD-linked oxidoreductase dpmaF                     | P9WEY2     | <i>Metarhizium anisopliae</i>   | Cytoplasm     |
| Dihydroxyacetone kinase                             | O74192     | <i>Komagataella pastoris</i>    | Cytoplasm     |
| Acetyl-CoA carboxylase dmxL1                        | A0A4P8DJE6 | <i>Cryptosporiopsis sp.</i>     | Nucleus       |
| Acetyl-coenzyme A synthetase                        | P16929     | <i>Neurospora crassa</i>        | Cytoplasm     |
| Acyl-coenzyme A oxidase                             | Q756A9     | <i>Ashbya gossypii</i>          | Peroxisome    |

**Carbohydrate metabolism**

|                                |            |                                 |               |
|--------------------------------|------------|---------------------------------|---------------|
| Mannitol dehydrogenase 2       | P0CX09     | <i>Saccharomyces cerevisiae</i> | Cytoplasm     |
| Alpha-L-rhamnosidase           | A0A2H3TSB5 | <i>Fusarium oxysporum</i>       | Cytoplasm     |
| GH16 domain-containing protein | A0A8H5A268 | <i>Fusarium oxysporum</i>       | Mitochondrion |
| alpha-1,2-Mannosidase          | A0A6M7YP62 | <i>Fusarium oxysporum</i>       | Membrane      |

|                                                              |            |                                 |                                            |
|--------------------------------------------------------------|------------|---------------------------------|--------------------------------------------|
| Glycerol-3-phosphate dehydrogenase [NAD(+)]                  | W9IWZ5     | <i>Fusarium oxysporum</i>       | glycerol-3-phosphate dehydrogenase complex |
| Glyco_transf_28 domain-containing protein                    | A0A8H6LSD4 | <i>Fusarium oxysporum</i>       | Cytoplasm                                  |
| UDP-glucose 4-epimerase                                      | W9JR32     | <i>Fusarium oxysporum</i>       | Cytoplasm                                  |
| Alpha-L-arabinofuranosidase                                  | B6F261     | <i>Fusarium oxysporum</i>       | Secreted                                   |
| Cellulase domain-containing protein                          | W9I5E6     | <i>Fusarium oxysporum</i>       | Membrane                                   |
| Glycerol-3-phosphate dehydrogenase [NAD(+)] 2, mitochondrial | P41911     | <i>Saccharomyces cerevisiae</i> | Cytoplasm                                  |
| Endochitinase 3 (Fragment)                                   | Q6QDR4     | <i>Metarhizium anisopliae</i>   | Secreted                                   |
| Lactam utilization protein lamB                              | P38096     | <i>Emericella nidulans</i>      | Cytoplasm                                  |

**Regulation Factor or Signaling**

|                                            |        |                                 |           |
|--------------------------------------------|--------|---------------------------------|-----------|
| Serine/threonine-protein kinase PTK2/STK2  | P47116 | <i>Saccharomyces cerevisiae</i> | Nucleus   |
| Regulator of Ty1 transposition protein 103 | Q05543 | <i>Saccharomyces cerevisiae</i> | Nucleus   |
| Radiation-sensitive protein 28             | Q12021 | <i>Saccharomyces cerevisiae</i> | Nucleus   |
| GATA-type domain-containing protein        | W9KH05 | <i>Fusarium oxysporum</i>       | Nucleus   |
| Ino eighty subunit 2                       | P40154 | <i>Saccharomyces cerevisiae</i> | Nucleus   |
| Clustered mitochondria protein 1           | Q03690 | <i>Saccharomyces cerevisiae</i> | Cytoplasm |
| DNA cross-link repair protein PSO2/SNM1    | P30620 | <i>Saccharomyces cerevisiae</i> | Nucleus   |
| Protein SST2                               | P11972 | <i>Saccharomyces cerevisiae</i> | Membrane  |

|                                                               |        |                                 |                    |
|---------------------------------------------------------------|--------|---------------------------------|--------------------|
| Aminodeoxychorismate synthase                                 | P37254 | <i>Saccharomyces cerevisiae</i> | Cytoplasm          |
| Transcription initiation factor<br>TFIID subunit 1            | P46677 | <i>Saccharomyces cerevisiae</i> | Nucleus            |
| NuA3 HAT complex<br>component NTO1                            | Q12311 | <i>Saccharomyces cerevisiae</i> | Nucleus            |
| Protein phosphatase PP2A<br>regulatory subunit A              | P31383 | <i>Saccharomyces cerevisiae</i> | Cytoplasm/ Nucleus |
| Tyrosyl-DNA phosphodiesterase 1                               | P38319 | <i>Saccharomyces cerevisiae</i> | Cytoplasm/ Nucleus |
| Silencing boundary-establishment<br>protein FUB1              | P25659 | <i>Saccharomyces cerevisiae</i> | Nucleus            |
| E3 ubiquitin-protein ligase complex<br>SLX5-SLX8 subunit SLX5 | P32828 | <i>Saccharomyces cerevisiae</i> | Nucleus            |
| Respiration factor 2                                          | P46974 | <i>Saccharomyces cerevisiae</i> | Nucleus            |
| APC/C-CDH1 modulator 1                                        | Q08981 | <i>Saccharomyces cerevisiae</i> | Nucleus            |
| Ribosome-interacting GTPase 1                                 | P53295 | <i>Saccharomyces cerevisiae</i> | Cytoplasm          |
| Casein kinase II subunit beta'                                | P43639 | <i>Saccharomyces cerevisiae</i> | Cytoplasm/Nucleus  |
| Type 1 phosphatases regulator YPI1                            | P43587 | <i>Saccharomyces cerevisiae</i> | Nucleus            |
| DNA repair protein XRS2                                       | P33301 | <i>Saccharomyces cerevisiae</i> | Nucleus            |
| Regulatory protein SWI4                                       | P25302 | <i>Saccharomyces cerevisiae</i> | Nucleus            |

|                                                       |            |                                 |                   |
|-------------------------------------------------------|------------|---------------------------------|-------------------|
| SWIRM domain-containing protein FUN19                 | P28003     | <i>Saccharomyces cerevisiae</i> | Nucleus           |
| Cytosolic Fe-S cluster assembly factor CFD1           | P40558     | <i>Saccharomyces cerevisiae</i> | Nucleus           |
| F-box protein COS111                                  | P38308     | <i>Saccharomyces cerevisiae</i> | Mitochondrion     |
| HDA1 complex subunit 2                                | Q06629     | <i>Saccharomyces cerevisiae</i> | Nucleus           |
| Serine/threonine-protein kinase Tel1                  | F9G3R4     | <i>Saccharomyces cerevisiae</i> | Chromosome        |
| 1-phosphatidylinositol 4-kinase                       | W9LB23     | <i>Fusarium oxysporum</i>       | Nucleus/Cytoplasm |
| RFX-type winged-helix domain-containing protein       | W9KMD6     | <i>Fusarium oxysporum</i>       | Nucleus           |
| Histone deacetylase                                   | A0A0D2YC83 | <i>Fusarium oxysporum</i>       | Nucleus           |
| INCENP_ARK-bind domain-containing protein             | W9KH71     | <i>Fusarium oxysporum</i>       | Nucleus           |
| Phosphatidylinositol 3-kinase VPS34                   | A0A0D2XHC6 | <i>Fusarium oxysporum</i>       | Nucleus           |
| Polyadenylate-binding protein                         | W9I1Q9     | <i>Fusarium oxysporum</i>       | Cytoplasm         |
| BZIP domain-containing protein                        | A0A6M7Z7J4 | <i>Fusarium oxysporum</i>       | Nucleus           |
| 26S proteasome regulatory subunit RPN1                | W9KBT4     | <i>Fusarium oxysporum</i>       | Proteosoma        |
| Mediator of RNA polymerase II transcription subunit 5 | A0A0D2XC79 | <i>Fusarium oxysporum</i>       | Nucleus           |

|                                                          |        |                                    |                                  |
|----------------------------------------------------------|--------|------------------------------------|----------------------------------|
| Histone transcription regulator<br>3 homolog             | Q4IFH8 | <i>Gibberella zeae</i>             | Nucleus                          |
| Mediator of RNA polymerase II<br>transcription subunit 7 | Q5AEN6 | <i>Candida albicans</i>            | Nucleus                          |
| Guanine nucleotide-binding<br>protein subunit            | O74227 | <i>Cochliobolus heterostrophus</i> | heterotrimeric G-protein complex |
| Multiprotein-bridging factor 1                           | Q52BY4 | <i>Magnaporthe oryzae</i>          | Nucleus                          |
| CCR4-Not complex 3'-5'-<br>exoribonuclease subunit Ccr4  | Q9C2R2 | <i>Neurospora crassa</i>           | Nucleus                          |
| Transcriptional regulatory protein PHO23                 | P50947 | <i>Saccharomyces cerevisiae</i>    | Nucleus                          |
| Protein kinase C-like                                    | P87253 | <i>Neurospora crassa</i>           | Cell septum                      |
| Signal recognition particle<br>receptor subunit beta     | P36057 | <i>Saccharomyces cerevisiae</i>    | Endoplasmic reticulum membrane   |
| Cutinase transcription factor 1 alpha                    | P52958 | <i>Fusarium vanettenii</i>         | Nucleus                          |
| TATA-binding protein-associated<br>factor mot1           | P32333 | <i>Saccharomyces cerevisiae</i>    | Nucleus                          |
| EKC/KEOPS complex<br>subunit BUD32                       | B7XIB8 | <i>Enterocytozoon bieneusi</i>     | Chromosome                       |
| GPI ethanolamine phosphate<br>transferase 1              | Q6CW36 | <i>Kluyveromyces lactis</i>        | Endoplasmic reticulum membrane   |
| <b><u>Transcription regulation</u></b>                   |        |                                    |                                  |
| Transcription factor CSR2                                | Q12734 | <i>Saccharomyces cerevisiae</i>    | Nucleus                          |



|                                                       |        |                           |           |
|-------------------------------------------------------|--------|---------------------------|-----------|
| MFS domain-containing protein                         | W9KH71 | <i>Fusarium oxysporum</i> | Cytoplasm |
| Mediator of RNA polymerase II transcription subunit 5 | Q4PAB8 | <i>Ustilago maydis</i>    | Nucleus   |

### **Cell division**

|                                          |        |                                 |         |
|------------------------------------------|--------|---------------------------------|---------|
| Anaphase-promoting complex subunit CDC16 | P09798 | <i>Saccharomyces cerevisiae</i> | Nucleus |
|------------------------------------------|--------|---------------------------------|---------|

### **Amino acid metabolism**

|                                                        |        |                                 |               |
|--------------------------------------------------------|--------|---------------------------------|---------------|
| Glycine dehydrogenase (decarboxylating), mitochondrial | P26969 | <i>Saccharomyces cerevisiae</i> | Mitochondrion |
| Pyruvate decarboxylase isozyme 3                       | P11986 | <i>Saccharomyces cerevisiae</i> | Cytoplasm     |
| Cystathionine beta-synthase                            | P32582 | <i>Saccharomyces cerevisiae</i> | Cytoplasm     |
| Acetolactate synthase small subunit, mitochondrial     | P25605 | <i>Saccharomyces cerevisiae</i> | Mitochondrion |
| Pyruvate decarboxylase isozyme 2                       | P16467 | <i>Saccharomyces cerevisiae</i> | Cytoplasm     |
| Alanine--tRNA ligase                                   | W9L4A1 | <i>Fusarium oxysporum</i>       | Mitochondrion |
| Imidazoleglycerol-phosphate dehydratase                | W9J9C7 | <i>Fusarium oxysporum</i>       | Mitochondrion |
| D-3-phosphoglycerate dehydrogenase                     | W9KMP9 | <i>Fusarium oxysporum</i>       | Cytoplasm     |
| C-1-tetrahydrofolate synthase, mitochondrial           | O43007 | <i>Saccharomyces pombe</i>      | Mitochondrion |

|                                                                |            |                                 |               |
|----------------------------------------------------------------|------------|---------------------------------|---------------|
| Arginine biosynthesis bifunctional protein ArgJ, mitochondrial | Q6C627     | <i>Yarrowia lipolytica</i>      | Mitochondrion |
| Methylthioribulose-1-phosphate dehydratase                     | B6QQ13     | <i>Talaromyces marneffei</i>    | Cytoplasm     |
| Pentafunctional AROM polypeptide                               | B2B223     | <i>Podospira anserina</i>       | Cytoplasm     |
| Copper transport protein                                       | P25355     | <i>Saccharomyces cerevisiae</i> | Cytoplasm     |
| 3-isopropylmalate dehydratase                                  | Q74ZM9     | <i>Ashbya gossypii</i>          | Cytoplasm     |
| Histidine biosynthesis trifunctional protein                   | O74712     | <i>Candida albicans</i>         | Cytoplasm     |
| Arginine biosynthesis bifunctional protein ArgJ, mitochondrial | A0A5N6H9B7 | <i>Aspergillus flavus</i>       | Cytoplasm     |

#### **Stress and Defense Response**

|                                                |        |                                  |               |
|------------------------------------------------|--------|----------------------------------|---------------|
| mitochondrial hydrolase                        | P53889 | <i>Saccharomyces cerevisiae</i>  | Mitochondrion |
| oxidoreductase C24B10.20                       | Q9P7I6 | <i>Schizosaccharomyces pombe</i> | Cytoplasm     |
| Glutathione peroxidase-like peroxiredoxin gpx1 | O59858 | <i>Schizosaccharomyces pombe</i> | Cytoplasm     |

#### **Pathogenicity**

|                                               |        |                               |          |
|-----------------------------------------------|--------|-------------------------------|----------|
| Acetyltransferase sirH                        | Q6Q889 | <i>Leptosphaeria maculans</i> | Membrane |
| Mitogen-activated protein kinase kinase MST11 | G4N7X0 | <i>Magnaporthe oryzae</i>     | Nucleus  |

|                                                |            |                                 |                                |
|------------------------------------------------|------------|---------------------------------|--------------------------------|
| Subtilisin-like protease 6                     | A1XIH0     | <i>Trichophyton equinum</i>     | Secreted                       |
| <b><u>Other Metabolites</u></b>                |            |                                 |                                |
| Thiamine biosynthetic bifunctional enzyme      | P41835     | <i>Saccharomyces cerevisiae</i> | Cytoplasm                      |
| FAD_binding_3 domain-containing protein        | A0A6M7Z3Q6 | <i>Fusarium oxysporum</i>       | Membrane                       |
| Amine oxidase                                  | F9FXV0     | <i>Fusarium oxysporum</i>       | Cytoplasm                      |
| Tyrosinase                                     | A0A6M7ZIT1 | <i>Fusarium oxysporum</i>       | Endoplasmic reticulum /Golgi   |
| Iterative polyketide synthase afoE             | Q5BEJ6     | <i>Emericella nidulans</i>      | Endoplasmic reticulum          |
| Molybdenum cofactor sulfurase                  | B0Y691     | <i>Neosartorya fumigata</i>     | Cytoplasm                      |
| oxidoreductase C30D10.05c                      | O14351     | <i>Saccharomyces pombe</i>      | Cytoplasm                      |
| Adenylyltransferase and sulfurtransferase uba4 | A4RPM5     | <i>Magnaporthe oryzae</i>       | Cytoplasm                      |
| Hybrid PKS-NRPS synthetase iliA                | P0DO30     | <i>Neonectria sp.</i>           | Endoplasmic reticulum membrane |
| Halogenase otaD                                | A2R6G7     | <i>Aspergillus niger</i>        | Mitochondrion                  |
| Dehydrogenase xptC                             | Q5AUN2     | <i>Emericella nidulans</i>      | Mitochondrion                  |
| Cytochrome P450 monooxygenase atnE             | Q5AUZ9     | <i>Emericella nidulans</i>      | Membrane                       |
| <b><u>Unknown</u></b>                          |            |                                 |                                |
| NADP-dependent 3-hydroxy                       | Q05016     | <i>Saccharomyces cerevisiae</i> | Cytoplasm                      |

|                                                    |            |                                 |                                |
|----------------------------------------------------|------------|---------------------------------|--------------------------------|
| acid dehydrogenase                                 |            |                                 |                                |
| UPF0641 membrane protein<br>YHR140W                | P38842     | <i>Saccharomyces cerevisiae</i> | Endoplasmic reticulum membrane |
| Protein FYV8                                       | P46949     | <i>Saccharomyces cerevisiae</i> | Endoplasmic reticulum membrane |
| Protein SGM1                                       | Q06629     | <i>Saccharomyces cerevisiae</i> | Nucleus                        |
| FAD-binding PCMH-type<br>domain-containing protein | A0A6M7YWV0 | <i>Fusarium oxysporum</i>       | Nucleus                        |
| HpcH_HpaI domain-<br>containing protein            | A0A6M7Z6R5 | <i>Fusarium oxysporum</i>       | Mitochondrion                  |
| Transket_pyr domain-<br>containing protein         | A0A6M7Z6R5 | <i>Fusarium oxysporum</i>       | Mitochondrion                  |
| NB-ARC domain-<br>containing protein               | A0A420MRP4 | <i>Fusarium oxysporum</i>       | Cytoplasm                      |
| COesterase domain-<br>containing protein           | X0H0X2     | <i>Fusarium oxysporum</i>       | Nucleus                        |
| RNB domain-<br>containing protein                  | A0A0D2XD23 | <i>Fusarium oxysporum</i>       | Nucleus                        |
| AB hydrolase-1 domain-<br>containing protein       | X0HJI4     | <i>Fusarium oxysporum</i>       | Cytoplasm                      |
| OTU domain-containing protein                      | W9JXF0     | <i>Fusarium oxysporum</i>       | Nucleus                        |
| C2H2-type domain-<br>containing protein            | W9JIH0     | <i>Fusarium oxysporum</i>       | Nucleus                        |
| Amidase                                            | W9K8T3     | <i>Fusarium oxysporum</i>       | Cytoplasm                      |

|                                               |            |                           |               |
|-----------------------------------------------|------------|---------------------------|---------------|
| HEME_HALOPEROXIDASE domain-containing protein | A0A2H3U0R6 | <i>Fusarium oxysporum</i> | Nucleus       |
| Ribonuclease Z                                | A0A8H4Z2B5 | <i>Fusarium oxysporum</i> | Cytoplasm     |
| GMC_OxRdtase_N domain-containing protein      | W9I4W9     | <i>Fusarium oxysporum</i> | Cytoplasm     |
| AB hydrolase-1 domain-containing protein      | A0A6M7ZKL2 | <i>Fusarium oxysporum</i> | Nucleus       |
| HET domain-containing protein                 | X0B8E0     | <i>Fusarium oxysporum</i> | Cytoplasm     |
| Hydrolase_4 domain-containing protein         | A0A2H3SLL2 | <i>Fusarium oxysporum</i> | Cytoplasm     |
| Amidohydro-rel domain-containing protein      | A0A2H3SLL2 | <i>Fusarium oxysporum</i> | Peroxisomal   |
| Fido domain-containing protein                | A0A420RA84 | <i>Fusarium oxysporum</i> | Nucleus       |
| Aldedh domain-containing protein              | F9F287     | <i>Fusarium oxysporum</i> | Cytoplasm     |
| NACHT domain-containing protein               | A0A6M7Z9K2 | <i>Fusarium oxysporum</i> | Nucleus       |
| NAD(+) diphosphatase                          | A0A559KVW1 | <i>Fusarium oxysporum</i> | Nucleus       |
| P4Hc domain-containing Protein                | A0A0D2XZJ7 | <i>Fusarium oxysporum</i> | Cytoplasm     |
| Methyltransf_25 domain-containing protein     | W9JMD3     | <i>Fusarium oxysporum</i> | Mitochondrion |

|                                             |            |                                |                                |
|---------------------------------------------|------------|--------------------------------|--------------------------------|
| Translation machinery-associated protein 22 | A2QHG9     | <i>Aspergillus niger</i>       | Cytoplasm                      |
| Siderophore transporter MYCGRDRAFT_70577    | F9X9V3     | <i>Zymoseptoria tritici</i>    | Membrane                       |
| Malformin synthetase mlfA                   | A0A1L9NGU5 | <i>Aspergillus tubingensis</i> | Endoplasmic reticulum membrane |

**Supplementary Table S2** – Unique proteins identified in the treated group by ESI-LC-MS/MS

| Protein Name                                                  | ID (Uniprot) | Organism Reference              | Cellular Compartment                  |
|---------------------------------------------------------------|--------------|---------------------------------|---------------------------------------|
| <b><u>Transport</u></b>                                       |              |                                 |                                       |
| Vacuolar protein-sorting-associated protein 46                | P69771       | <i>Saccharomyces cerevisiae</i> | Endosome membrane                     |
| Autophagy-related protein 9                                   | Q06628       | <i>Saccharomyces cerevisiae</i> | Membrane                              |
| Mitochondrial import inner membrane translocase subunit TIM23 | P32897       | <i>Saccharomyces cerevisiae</i> | Mitochondrion inner membrane          |
| Low affinity vacuolar monovalent cation/H (+) antiporter      | P42839       | <i>Saccharomyces cerevisiae</i> | Vacuole membrane                      |
| GTP-binding protein GTR1                                      | Q00582       | <i>Saccharomyces cerevisiae</i> | Vacuole membrane                      |
| Protein SNQ2                                                  | P32568       | <i>Saccharomyces cerevisiae</i> | Membrane                              |
| Intracellular protein transport protein                       | P25386       | <i>Saccharomyces cerevisiae</i> | Endoplasmic reticulum/Golgi apparatus |
| Vacuolar protein sorting/targeting protein VPS                | P54787       | <i>Saccharomyces cerevisiae</i> | Golgi apparatus                       |
| Hexose transporter HXT9                                       | P40885       | <i>Saccharomyces cerevisiae</i> | Membrane                              |
| Conserved oligomeric Golgi complex subunit 6                  | P54787       | <i>Saccharomyces cerevisiae</i> | Golgi membrane                        |
| Membrane-anchored lipid-binding protein LAM6                  | Q08001       | <i>Saccharomyces cerevisiae</i> | Endoplasmic reticulum membrane        |
| GTP-binding protein YPT32/YPT11                               | P51996       | <i>Saccharomyces cerevisiae</i> | Golgi apparatus membrane              |

|                                                              |            |                           |                                  |                       |
|--------------------------------------------------------------|------------|---------------------------|----------------------------------|-----------------------|
| MFS domain-containing protein                                | A0A5C6SDT0 | <i>Fusarium oxysporum</i> | Membrane                         |                       |
| Importin N-terminal domain-containing Protein                |            | A0A0D2XQA6                | <i>Fusarium oxysporum</i>        | Nucleus               |
| FAD-binding FR-type domain-containing Protein                | W9HR83     |                           | <i>Fusarium oxysporum</i>        | Membrane              |
| GPI ethanolamine phosphate transferase reticulum             | A0A420Q1C6 |                           | <i>Fusarium oxysporum</i>        | Endoplasmic           |
| Bifunctional cytochrome P450/NADPH--P450 reductase cytoplasm | Q9Y8G7     |                           | <i>Fusarium oxysporum</i>        | Nucleus /             |
| MFS domain-containing protein                                | A0A5C6SDT0 |                           | <i>Fusarium oxysporum</i>        | Membrane              |
| Adenylyltransferase AND sulfurtransferase uba4               | A0A0D2XXF9 |                           | <i>Fusarium oxysporum</i>        | Cytosol               |
| MFS domain-containing protein                                | A0A5C6SDT0 |                           | <i>Fusarium oxysporum</i>        | Membrane              |
| Cation_ATPase_N domain-containing protein                    | A0A8H5ALP8 |                           | <i>Fusarium oxysporum</i>        | Membrane              |
| Proton-translocating NAD(P)(+) transhydrogenase              | P73496     |                           | <i>Fusarium oxysporum</i>        | Membrane              |
| Serine/threonine-protein kinase ATG1                         | Q52EB3     |                           | <i>Magnaporthe oryzae</i>        | Cytoplasm             |
| DnaJ-related protein spj1                                    | O94625     |                           | <i>Schizosaccharomyces pombe</i> | Endoplasmic reticulum |
| Mating factor M secretion protein mam1                       | P78966     |                           | <i>Schizosaccharomyces pombe</i> | Membrane              |
| Protein SMY2                                                 | P32909     |                           | <i>Saccharomyces cerevisiae</i>  | Cytoplasm             |



|                                                                                                           |        |                                  |                     |
|-----------------------------------------------------------------------------------------------------------|--------|----------------------------------|---------------------|
| Low-affinity phosphate transporter PHO91                                                                  | P27514 | <i>Saccharomyces cerevisiae</i>  | Vacuole membrane    |
| Peroxisomal membrane protein PAS20                                                                        | P80667 | <i>Saccharomyces cerevisiae</i>  | Peroxisome membrane |
| CRAL-TRIO domain-containing protein C23B6.04c                                                             | Q9UU99 | <i>Schizosaccharomyces pombe</i> | Cell membrane       |
| Copper transport protein ctr4                                                                             | O94722 | <i>Schizosaccharomyces pombe</i> | Membrane            |
| Plasma membrane ATPase 1                                                                                  | P09627 | <i>Schizosaccharomyces pombe</i> | Cell membrane       |
| Presequence translocated-associated motor<br>Mitochondrion inner membrane<br>subunit pam17, mitochondrial | C8VTR5 | <i>Emericella nidulans</i>       |                     |
| Vacuolar protein-sorting protein bro-1                                                                    | Q7SAN9 | <i>Neurospora crassa</i>         | Endosome            |
| ATPase GET3<br>Cytoplasm                                                                                  | Q6CPX3 | <i>Kluyveromyces lactis</i>      |                     |
| Vacuolar protein sorting/targeting protein 10                                                             | C5FYX2 | <i>Arthroderma otae</i>          | Golgi apparatus     |
| Major glycerophosphoinositol permease GIT3                                                                | Q5A1L6 | <i>Candida albicans</i>          | Cell membrane       |
| Plasma membrane ATPase                                                                                    | P24545 | <i>Zygosaccharomyces rouxii</i>  | Cell membrane       |

#### **Cell Function and Structure**

|                                  |        |                                 |           |
|----------------------------------|--------|---------------------------------|-----------|
| Mitotic check point protein BFA1 | P47113 | <i>Saccharomyces cerevisiae</i> | Cytoplasm |
| ATP-dependent DNA helicase CHL1  | P22516 | <i>Saccharomyces cerevisiae</i> | Nucleus   |

|                                                              |        |                                 |                         |
|--------------------------------------------------------------|--------|---------------------------------|-------------------------|
| Actin-related protein 2                                      | P32381 | <i>Saccharomyces cerevisiae</i> | Cytoplasm               |
| Growth regulation protein                                    | P12611 | <i>Saccharomyces cerevisiae</i> | Nucleus                 |
| Serine/threonine-protein kinase<br>YPK2/YKR2                 | P18961 | <i>Saccharomyces cerevisiae</i> | Cytoplasm               |
| Protein UIP5                                                 | P36137 | <i>Saccharomyces cerevisiae</i> | Nucleus membrane        |
| Nucleoporin NUP159                                           | P40477 | <i>Saccharomyces cerevisiae</i> | Nucleus                 |
| Protein TMA23                                                | Q03525 | <i>Saccharomyces cerevisiae</i> | Nucleus                 |
| Exocyst complex component SEC8                               | O74562 | <i>Saccharomyces cerevisiae</i> | Cytoplasm               |
| Protein STU1                                                 | P38198 | <i>Saccharomyces cerevisiae</i> | Centromere              |
| Protein PAL1                                                 | Q05518 | <i>Saccharomyces cerevisiae</i> | Membrane                |
| Serine/threonine-protein kinase CLA4                         | P48562 | <i>Saccharomyces cerevisiae</i> | Cytoplasm, cytoskeleton |
| Sister chromatid cohesion protein 1                          | P40090 | <i>Saccharomyces cerevisiae</i> | Nucleus                 |
| Essential for maintenance of the<br>cell wall protein 1      | P42842 | <i>Saccharomyces cerevisiae</i> | Cytoplasm               |
| Serine/threonine-protein kinase GIN4                         | Q12263 | <i>Saccharomyces cerevisiae</i> | Cytoplasm               |
| Phosphatidylinositol 4,5-bisphosphate<br>5-phosphatase INP51 | P40559 | <i>Saccharomyces cerevisiae</i> | Cytoplasm               |
| Monopolar spindle protein 2                                  | P53159 | <i>Saccharomyces cerevisiae</i> | Cytoplasm               |
| Chitin synthase                                              | Q873Z8 | <i>Fusarium oxysporum</i>       | Cytoplasm               |

|                                               |        |                                      |                                                |
|-----------------------------------------------|--------|--------------------------------------|------------------------------------------------|
| Aldedh domain-containing protein              | F9F287 | <i>Fusarium oxysporum</i>            | Cytoplasm                                      |
| Protein SPA2                                  | P23201 | <i>Saccharomyces cerevisiae</i>      | Cell tip                                       |
| ASTRA-associated protein 1                    | A7ESR0 | <i>Sclerotinia sclerotiorum</i>      | Nucleus                                        |
| Pheromone-processing<br>carboxypeptidase kex1 | B6K7U7 | <i>Schizosaccharomyces japonicus</i> | Golgi apparatus / trans-Golgi network membrane |
| Autophagy-related protein 2                   | A2QSC9 | <i>Aspergillus niger</i>             | Endoplasmic reticulum membrane                 |
| Inner kinetochore subunit CTF19               | Q02732 | <i>Saccharomyces cerevisiae</i>      | Nucleus                                        |
| Autophagy-related protein 9                   | Q75A48 | <i>Saccharomyces cerevisiae</i>      | Preautophagosomal structure membrane           |
| Serine/threonine-protein kinase tor2          | Q9Y7K2 | <i>Schizosaccharomyces pombe</i>     | Cytoplasm                                      |
| Anaphase-promoting complex subunit 2          | Q12440 | <i>Saccharomyces cerevisiae</i>      | Cytoplasm                                      |
| GPI ethanolamine phosphate transferase 1      | Q4ILH3 | <i>Gibberella zeae</i>               | Endoplasmic reticulum membrane                 |
| Aspartic proteinase yapsin-7                  | Q06325 | <i>Saccharomyces cerevisiae</i>      | Cytoplasm                                      |
| Inactive metallocarboxypeptidase ecm14        | B8M2K0 | <i>Talaromyces stipitatus</i>        | Vacuole                                        |
| MICOS complex subunit mic60                   | Q7SFD8 | <i>Neurospora crassa</i>             | Mitochondrion inner membrane                   |
| Sporulation-specific protein 22               | P40511 | <i>Saccharomyces cerevisiae</i>      | Cell membrane                                  |

**Energetic metabolism**

|                                                             |        |                                 |               |
|-------------------------------------------------------------|--------|---------------------------------|---------------|
| Succinate dehydrogenase assembly<br>factor 3, mitochondrial | Q04401 | <i>Saccharomyces cerevisiae</i> | Mitochondrion |
|-------------------------------------------------------------|--------|---------------------------------|---------------|

|                                                                  |            |                                  |               |       |
|------------------------------------------------------------------|------------|----------------------------------|---------------|-------|
| Cytochrome c mitochondrial import<br>membrane factor CYC2        | P38909     | <i>Saccharomyces cerevisiae</i>  | Mitochondrion | inner |
| Alcohol dehydrogenase 4                                          | P10127     | <i>Saccharomyces cerevisiae</i>  | Mitochondrion |       |
| 54S ribosomal protein L17, mitochondrial                         | P36528     | <i>Saccharomyces cerevisiae</i>  | Mitochondrion |       |
| NAD-dependent malic enzyme, mitochondrial                        | P36013     | <i>Saccharomyces cerevisiae</i>  | Mitochondrion |       |
| Glycogen debrancher                                              | A0A2H3T8G3 | <i>Fusarium oxysporum</i>        | Cytoplasm     |       |
| Kinesin motor domain-containing protein                          | W9L7Z1     | <i>Fusarium oxysporum</i>        | Mitochondrion |       |
| Structural maintenance of chromosomes<br>Protein                 | A0A0D2XQL5 | <i>Fusarium oxysporum</i>        | Nucleus       |       |
| Kinesin-like protein<br>Microtubule                              | A0A6M7Z0I0 | <i>Fusarium oxysporum</i>        |               |       |
| HTH APSES-type domain-containing<br>Nucleus Protein              | W9KJX9     | <i>Fusarium oxysporum</i>        |               |       |
| Glycerol kinase<br>Cytoplasm                                     | W9JLB5     | <i>Fusarium oxysporum</i>        |               |       |
| Isoamyl acetate-hydrolyzing esterase                             | O74648     | <i>Schizosaccharomyces pombe</i> | Cytoplasm     |       |
| ATP synthase subunit 5, mitochondrial<br>inner membrane          | A0A6A5Q1Y3 | <i>Saccharomyces cerevisiae</i>  | Mitochondrion |       |
| Phosphoglycerate kinase 2                                        | P29406     | <i>Rhizopus niveus</i>           | Cytoplasm     |       |
| NADH-ubiquinone oxidoreductase chain 4<br>Mitochondrion membrane | A9RAH8     | <i>Debaryomyces hansenii</i>     |               |       |

**Protein Folding and metabolism**

|                                                                  |        |                                 |                                |
|------------------------------------------------------------------|--------|---------------------------------|--------------------------------|
| E3 ubiquitin-protein ligase<br>substrate receptor                | P39940 | <i>Saccharomyces cerevisiae</i> | Cytoplasm                      |
| Isoleucine--tRNA ligase, cytoplasmic                             | P09436 | <i>Saccharomyces cerevisiae</i> | Cytoplasm                      |
| N-terminal acetyltransferase A<br>complex subunit NAT1           | P12945 | <i>Saccharomyces cerevisiae</i> | Cytoplasm                      |
| N-alpha-acetyltransferase 35, NatC<br>auxiliary subunit          | Q02197 | <i>Saccharomyces cerevisiae</i> | Cytoplasm                      |
| 5-demethoxyubiquinone hydroxylase,<br>mitochondrial              | P41735 | <i>Saccharomyces cerevisiae</i> | Mitochondrion inner membrane   |
| CUE domain-containing protein CUE4                               | Q04201 | <i>Saccharomyces cerevisiae</i> | Cytoplasm                      |
| Low molecular weight phosphotyrosine<br>protein phosphatase      | P40347 | <i>Saccharomyces cerevisiae</i> | Cytoplasm                      |
| H/ACA ribonucleoprotein complex<br>non-core subunit NAF1         | P53919 | <i>Saccharomyces cerevisiae</i> | Nucleus                        |
| Elongation factor 3B                                             | P53978 | <i>Saccharomyces cerevisiae</i> | Cytoplasm                      |
| Coupling of ubiquitin conjugation<br>to ER degradation protein 1 | Q08412 | <i>Saccharomyces cerevisiae</i> | Endoplasmic reticulum membrane |

|                                                     |            |                                  |                                |
|-----------------------------------------------------|------------|----------------------------------|--------------------------------|
| Actin cytoskeleton-regulatory complex protein PAN1  | P32521     | <i>Saccharomyces cerevisiae</i>  | Endosome membrane              |
| Ribosome biogenesis protein UTP30                   | P36144     | <i>Saccharomyces cerevisiae</i>  | Nucleus                        |
| Dolichyldiphosphatase                               | P53223     | <i>Saccharomyces cerevisiae</i>  | Endoplasmic reticulum membrane |
| Proteasome chaperone 1                              | P53196     | <i>Saccharomyces cerevisiae</i>  | Cytoplasm                      |
| Dipeptidase                                         | A0A2H3T5I7 | <i>Fusarium oxysporum</i>        | Cytoplasm                      |
| Peptidase_S8 domain-containing protein              | A0A420NBM7 | <i>Fusarium oxysporum</i>        | Nucleus                        |
| Leukotriene A-4 hydrolase homolog                   | W9ZSS5     | <i>Fusarium oxysporum</i>        | Endoplasmic reticulum          |
| Protein kinase domain-containing Protein            | A0A0D2XQE2 | <i>Fusarium oxysporum</i>        | Nucleus                        |
| Protein kinase domain-containing protein            | A0A0D2XQE2 | <i>Fusarium oxysporum</i>        | Cytoplasm                      |
| Protein kinase domain-containing protein            | A0A0D2XQE2 | <i>Fusarium oxysporum</i>        | Nucleus                        |
| 54S ribosomal protein yml6, mitochondrial           | O74801     | <i>Schizosaccharomyces pombe</i> | Mitochondrion                  |
| Methionine aminopeptidase 2                         | E3L3Q8     | <i>Puccinia graminis</i>         | Cytoplasm                      |
| Ubiquinone biosynthesis protein COQ4, mitochondrial | A5DVZ3     | <i>Lodderomyces elongisporus</i> | Mitochondrion inner membrane   |
| DUB-associated factor 1                             | Q99247     | <i>Saccharomyces cerevisiae</i>  | Cytoplasm                      |
| Isoleucine--tRNA ligase, mitochondrial              | Q9USL3     | <i>Schizosaccharomyces pombe</i> | Mitochondrion matrix           |
| Lon protease homolog 2, peroxisomal                 | Q9USL3     | <i>Neurospora crassa</i>         | Peroxisomal matrix             |

|                                                                   |            |                                  |                                |
|-------------------------------------------------------------------|------------|----------------------------------|--------------------------------|
| Protein OS-9 homolog                                              | Q756T2     | <i>Ashbya gossypii</i>           | Endoplasmic reticulum membrane |
| Eukaryotic translation initiation factor 6                        | A0A0B0DUG9 | <i>Neurospora crassa</i>         | Nucleus / nucleolus            |
| Alanine--tRNA ligase                                              | Q5AQL1     | <i>Emericella nidulans</i>       | Mitochondrion                  |
| Osmolarity two-component system protein SSK1                      | Q07084     | <i>Saccharomyces cerevisiae</i>  | Cytoplasm                      |
| Dol-P-Man:Man(5)GlcNAc(2)-PP-Dol<br>alpha-1,3-mannosyltransferase | 0TVF9      | <i>Phaeosphaeria nodorum</i>     | Endoplasmic reticulum membrane |
| Eukaryotic translation initiation<br>factor 3 subunit I           | P79083     | <i>Schizosaccharomyces pombe</i> | Cytoplasm                      |
| U3 small nucleolar RNA-associated protein 12                      | Q12220     | <i>Saccharomyces cerevisiae</i>  | Nucleus / nucleolus            |
| Zuotin                                                            | Q9Y7I8     | <i>Schizosaccharomyces pombe</i> | Cytosol                        |

### **DNA and RNA binding**

|                                  |        |                                 |           |
|----------------------------------|--------|---------------------------------|-----------|
| ATP-dependent RNA helicase ROK1  | P45818 | <i>Saccharomyces cerevisiae</i> | Nucleus   |
| Protein URA2                     | P07259 | <i>Saccharomyces cerevisiae</i> | Cytoplasm |
| RNA exonuclease 1                | Q12149 | <i>Saccharomyces cerevisiae</i> | Nucleus   |
| Pre-rRNA-processing protein IPI1 | P38803 | <i>Saccharomyces cerevisiae</i> | Nucleus   |
| Protein MPE1                     | P35728 | <i>Saccharomyces cerevisiae</i> | Nucleus   |

|                                                                         |            |                                 |                              |
|-------------------------------------------------------------------------|------------|---------------------------------|------------------------------|
| Cytoplasmic 60S subunit biogenesis factor REI1                          | P38344     | <i>Saccharomyces cerevisiae</i> | Cytoplasm                    |
| U4/U6 snRNA-associated-splicing factor PRP24                            | P49960     | <i>Saccharomyces cerevisiae</i> | Nucleus                      |
| 5'-deoxynucleotidase YBR242W                                            | P38331     | <i>Saccharomyces cerevisiae</i> | Cytoplasm                    |
| tRNA (cytidine(32)-2'-O)-methyltransferase non-catalytic subunit TRM732 | P38238     | <i>Saccharomyces cerevisiae</i> | Cytoplasm                    |
| Mitochondrial group I intron splicing factor CCM1                       | P48237     | <i>Saccharomyces cerevisiae</i> | Mitochondrion                |
| H/ACA ribonucleoprotein complex subunit CBF5                            | P33322     | <i>Saccharomyces cerevisiae</i> | Nucleus                      |
| DNA-directed RNA polymerase subunit                                     | A0A0C4DHV9 | <i>Fusarium oxysporum</i>       | Nucleus                      |
| Zn(2)-C6 fungal-type domain-containing Protein                          | A0A0D2XDM8 | <i>Fusarium oxysporum</i>       | Nucleus                      |
| DNA topoisomerase I                                                     | A0A2C8CY01 | <i>Fusarium oxysporum</i>       | Chromosome                   |
| Kynurenine 3-monooxygenase                                              | A0A2H3SUS1 | <i>Fusarium oxysporum</i>       | Mitochondrion outer membrane |
| Zn(2)-C6 fungal-type domain-containing protein                          | A0A0D2XDM8 | <i>Fusarium oxysporum</i>       | Nucleus                      |
| DNA-directed RNA polymerase subunit beta                                | A0A0C4DHV9 | <i>Fusarium oxysporum</i>       | Nucleus                      |
| DNA topoisomerase 2                                                     | A0A6M7YWD6 | <i>Fusarium oxysporum</i>       | Nucleus                      |



|                                                                      |            |                                  |                                   |
|----------------------------------------------------------------------|------------|----------------------------------|-----------------------------------|
| Fungal_trans domain-containing Protein                               | W9JP90     | <i>Fusarium oxysporum</i>        | Nucleus                           |
| 40S ribosomal protein S26                                            | W9I0R7     | <i>Fusarium oxysporum</i>        | Ribosome                          |
| CTP synthase                                                         | A0A6M7YU47 | <i>Fusarium oxysporum</i>        | Mitochondrion /cytoplasm          |
| eIF-2B GDP-GTP exchange factor subunit epsilon                       | X0LIC3     | <i>Fusarium oxysporum</i>        | Nucleus                           |
| Orotate phosphoribosyltransferase                                    | Q1DNB0     | <i>Coccidioides immitis</i>      | Mitochondrion                     |
| Flap endonuclease 1                                                  | A5E121     | <i>Lodderomyces elongisporus</i> | Nucleus/nucleolus                 |
| mRNA-capping enzyme subunit alpha                                    | Q01159     | <i>Schizosaccharomyces pombe</i> | Nucleus                           |
| Histone H4                                                           | Q6ZXX3     | <i>Ustilago maydis</i>           | Nucleosome                        |
| 60S ribosomal protein                                                | O13418     | <i>L15 Aspergillus niger</i>     | Ribosome                          |
| tRNA (uracil-O(2)-)-methyltransferase                                | Q6BRY1     | <i>Debaryomyces hansenii</i>     | Cytoplasm                         |
| U3 small nucleolar RNA-associated protein 10                         | A5E212     | <i>Lodderomyces elongisporus</i> | Nucleus/nucleolus/membrane        |
| 60S ribosomal protein L7                                             | Q6FSN6     | <i>Candida glabrata</i>          | Cytosolic large ribosomal subunit |
| Zinc finger CCCH domain-containing protein C337.12                   | O74823     | <i>Schizosaccharomyces pombe</i> | Nucleus                           |
| Polyadenylate-binding protein, cytoplasmic and nuclear               | A5DM21     | <i>Meyerozyma guilliermondii</i> | Nucleus/cytoplasm                 |
| ATP-dependent RNA helicase MRH4, mitochondrial                       | Q755C5     | <i>Ashbya gossypii</i>           | Mitochondrion                     |
| tRNA (adenine(58)-N(1))-methyltransferase non-catalytic subunit TRM6 | Q6CF35     | <i>Yarrowia lipolytica</i>       | Nucleus                           |
| Nucleolar protein 58                                                 | A2QE38     | <i>Aspergillus niger</i>         | Nucleus/nucleolus                 |

|                                                                      |        |                                  |                              |
|----------------------------------------------------------------------|--------|----------------------------------|------------------------------|
| ATP-dependent RNA helicase ROK1                                      | P45818 | <i>Saccharomyces cerevisiae</i>  | Nucleolus                    |
| Inosine triphosphate pyrophosphatase                                 | D5GCI8 | <i>Tuber melanosporum</i>        | Cytoplasm                    |
| 54S ribosomal protein L3, mitochondrial                              | O43042 | <i>Schizosaccharomyces pombe</i> | Mitochondrion                |
| tRNA (adenine(58)-N(1))-methyltransferase non-catalytic subunit trm6 | Q4WE58 | <i>Neosartorya fumigata</i>      | Nucleus                      |
| Cytochrome b mRNA maturase bI3                                       | A9RAG7 | <i>Debaryomyces hansenii</i>     | Mitochondrion inner membrane |
| Pre-mRNA-processing ATP-dependent RNA helicase PRP5                  | A5E058 | <i>Lodderomyces elongisporus</i> | Nucleus                      |
| Dihydroorotate dehydrogenase (quinone), mitochondrial                | Q63707 | <i>Lachancea kluyveri</i>        | Mitochondrion inner membrane |
| Mitochondrial escape protein 2                                       | P32843 | <i>Saccharomyces cerevisiae</i>  | Mitochondrion inner membrane |
| Flap endonuclease 1                                                  | Q6BLF4 | <i>Debaryomyces hansenii</i>     | Nucleus/nucleolus            |
| Orotidine 5'-phosphate decarboxylase                                 | P15188 | <i>Ustilago maydis</i>           | Cytosol                      |

### **Lipid Metabolism**

|                                |            |                           |                            |
|--------------------------------|------------|---------------------------|----------------------------|
| Manganese lipxygenase          | F9FRH4     | <i>Fusarium oxysporum</i> | Nucleus                    |
| PlsC domain-containing protein | A0A420SRZ6 | <i>Fusarium oxysporum</i> | Cellular anatomical Entity |

**Carbohydrate metabolism**

|                                                                |            |                                 |                           |
|----------------------------------------------------------------|------------|---------------------------------|---------------------------|
| Phosphoenolpyruvate carboxykinase (ATP)                        | P10963     | <i>Saccharomyces cerevisiae</i> | Cytoplasm                 |
| SNF1-activating kinase 1                                       | P38990     | <i>Saccharomyces cerevisiae</i> | Cytoplasm                 |
| Alpha-glucosidase MAL12                                        | P53341     | <i>Saccharomyces cerevisiae</i> | Membrane                  |
| Glucosamine-6-phosphate deaminase                              | W9KB79     | <i>Fusarium oxysporum</i>       | Cytoplasm                 |
| Cas1_AcylT domain-containing Protein                           | A0A6M7YXG0 | <i>Fusarium oxysporum</i>       | Membrane                  |
| Phosphoglycerate kinase                                        | A0A1D8MJA9 | <i>Fusarium oxysporum</i>       | Nucleus / cytoplasm       |
| Transcription activator of gluconeogenesis ERT1                | C4YLC3     | <i>Candida albicans</i>         | Nucleus                   |
| Beta-mannosidase B                                             | Q5B7W2     | <i>Emmericella nidulans</i>     | Cytoplasm                 |
| NAD(P)H-dependent D-xylose reductase                           | Q9P430     | <i>Scheffersomyces shehatae</i> | Cytoplasm                 |
| Exo-alpha-sialidase                                            | Q4WQS0     | <i>Neosartorya fumigata</i>     | Cytoplasm                 |
| Ergosteryl-beta-glucosidase                                    | P40566     | <i>Saccharomyces cerevisiae</i> | Cytoplasm/cytosol         |
| Cytosolic neutral trehalase                                    | P52494     | <i>Candida albicans</i>         | Cytoplasm                 |
| FAD-binding monooxygenase prhJ                                 | A0A1E1FFN7 | <i>Penicillium brasilianum</i>  | Cytoplasm / mitochondrion |
| Patatin-like phospholipase domain-containing protein MGG_12849 | A4R8V2     | <i>Magnaporthe oryzae</i>       | Membrane                  |

|                                                                 |            |                                  |                                |
|-----------------------------------------------------------------|------------|----------------------------------|--------------------------------|
| Lysophospholipase                                               | Q2H0D3     | <i>NTE1 Chaetomium globosum</i>  | Endoplasmic reticulum          |
| Non-reducing polyketide synthase stbA                           | A0A193PS74 | <i>Stachybotrys bisbyi</i>       | Nucleus                        |
| Triacylglycerol lipase ptl3                                     | Q9Y827     | <i>Schizosaccharomyces pombe</i> | Cytoplasm                      |
| Hybrid PKS-NRPS synthetase TAS1                                 | G4N137     | <i>Magnaporthe oryzae</i>        | Mitochondrion                  |
| Very-long-chain 3-oxoacyl-CoA reductase                         | Q75A60     | <i>Ashbya gossypii</i>           | Endoplasmic reticulum membrane |
| NADPH--cytochrome P450 reductase                                | P16603     | <i>Saccharomyces cerevisiae</i>  | Endoplasmic reticulum membrane |
| Patatin-like phospholipase domain-containing protein CIMG_04897 | Q1DXR6     | <i>Coccidioides immitis</i>      | Membrane                       |
| Fatty acid synthase subunit alpha                               | P43098     | <i>Candida albicans</i>          | Fatty acid synthase complex    |

### **Pathogenicity**

|                                      |            |                               |                       |
|--------------------------------------|------------|-------------------------------|-----------------------|
| Cyclochlorotine synthetase           | A0A0U1LQE6 | <i>Talaromyces islandicus</i> | Endoplasmic reticulum |
| Nonribosomal peptide synthetase 1    | Q4WT66     | <i>Neosartorya fumigata</i>   | Cytoplasm             |
| Nonribosomal peptide synthetase vlms | A0A024F910 | <i>Lecanicillium</i>          | Endoplasmic reticulum |
| Reducing polyketide synthase AFT16-1 | V5Y0F7     | <i>Alternaria alternata</i>   | Nucleus / Cytoplasm   |
| Acyltransferase BOA11                | A6SSW1     | <i>Botryotinia fuckeliana</i> | Cytoplasm             |

### **Regulation Factor or Signaling**

|                                        |        |                                 |         |
|----------------------------------------|--------|---------------------------------|---------|
| Negative regulator of RAS-cAMP pathway | P34072 | <i>Saccharomyces cerevisiae</i> | Nucleus |
|----------------------------------------|--------|---------------------------------|---------|

|                                                              |        |                                 |                              |         |
|--------------------------------------------------------------|--------|---------------------------------|------------------------------|---------|
| Protein SRL3                                                 | P36167 | <i>Saccharomyces cerevisiae</i> | Cytoplasm                    |         |
| SWI/SNF global transcription activator complex subunit       | P43554 | <i>Saccharomyces cerevisiae</i> | Nucleus                      |         |
| Pheromone a factor receptor                                  | Q00619 | <i>Saccharomyces cerevisiae</i> | Membrane                     |         |
| MEMO1 family protein MHO1                                    | P47085 | <i>Saccharomyces cerevisiae</i> | Cytoplasm                    |         |
| General transcription and DNA repair factor IIH subunit TFB2 | Q02939 | <i>Saccharomyces cerevisiae</i> | Nucleus                      |         |
| Regulatory protein SWI6                                      | P09959 | <i>Saccharomyces cerevisiae</i> | Nucleus/Cytoplasm            |         |
| Transcription regulatory protein SNF2                        | P22082 | <i>Saccharomyces cerevisiae</i> | Nucleus                      |         |
| Rho-GTPase-activating protein RGD2                           | P43556 | <i>Saccharomyces cerevisiae</i> | Nucleus                      |         |
| Protein PET122, mitochondrial                                | P10355 | <i>Saccharomyces cerevisiae</i> | Mitochondrion inner membrane |         |
| Transcription factor TFIIIB component B"                     | P46678 | <i>Saccharomyces cerevisiae</i> | Nucleus                      |         |
| Zinc finger protein MSN2                                     | P33748 | <i>Saccharomyces cerevisiae</i> | Cytoplasm/ Nucleus           |         |
| DNA repair/transcription protein MET18/MMS19                 | P40469 | <i>Saccharomyces cerevisiae</i> | Nucleus                      |         |
| Aprataxin-like protein                                       | Q08702 | <i>Saccharomyces cerevisiae</i> | Nucleus                      |         |
| Mitochondrial escape protein 2                               | P32843 | <i>Saccharomyces cerevisiae</i> | Mitochondrion inner membrane |         |
| Actin-related protein 8                                      | W9IT40 | <i>Fusarium oxysporum</i>       | Nucleus                      |         |
| Mediator of RNA polymerase II transcription subunit 1        |        | A0A0D2XHG4                      | <i>Fusarium oxysporum</i>    | Nucleus |

|                                                             |            |                                 |                        |
|-------------------------------------------------------------|------------|---------------------------------|------------------------|
| Zn(2)-C6 fungal-type domain-containing Protein              | A0A0D2XDM8 | <i>Fusarium oxysporum</i>       | Nucleus                |
| ATP-dependent DNA helicase                                  | A0A8H6LMY2 | <i>Fusarium oxysporum</i>       | Nucleus                |
| Fork-head domain-containing protein                         | W9JSR5     | <i>Fusarium oxysporum</i>       | Nucleus                |
| Serine/threonine-protein kinase TEL1                        | Q6CP76     | <i>Kluyveromyces lactis</i>     | Chromosome             |
| Vacuolar membrane-associated protein iml1                   | Q2UMR9     | <i>Aspergillus oryzae</i>       | Vacuolar membrane      |
| ISWI chromatin-remodeling complex ATPase ISW2               | Q5A310     | <i>Candida albicans</i>         | Nucleus                |
| DNA mismatch repair protein MSH3                            | Q6CHE5     | <i>Yarrowia lipolytica</i>      | Nucleus                |
| C2H2 type master regulator of conidiophore development brlA | P10069     | <i>Aspergillus oryzae</i>       | Nucleus                |
| Methylated-DNA--protein-cysteine methyltransferase          | Q6BVY4     | <i>Debaryomyces hansenii</i>    | Nucleus                |
| Verprolin                                                   | P37370     | <i>Saccharomyces cerevisiae</i> | Cytoplasm/cytoskeleton |
| Nicotinate catabolism cluster-specific transcription factor | C8VJW0     | <i>Emmericella nidulans</i>     | Nucleus                |
| Transcription activator of gluconeogenesis HCBG_00867       | C0NCM1     | <i>Ajellomyces capsulatus</i>   | Nucleus                |
| Negative cofactor 2 complex subunit beta                    | Q92317     | <i>Saccharomyces cerevisiae</i> | Nucleus                |
| Transcriptional regulator of filamentous growth FLO8        | Q59QW5     | <i>Candida albicans</i>         | Nucleus                |
| Transcription factor VHR1                                   | P40522     | <i>Saccharomyces cerevisiae</i> | Nucleus                |

|                                                                |        |                                  |                        |
|----------------------------------------------------------------|--------|----------------------------------|------------------------|
| bZip transcription factor GAP1                                 | Q6FRZ8 | <i>Candida glabrata</i>          | Nucleus                |
| RNA polymerase I-specific transcription initiation factor RRN5 | Q02983 | <i>Saccharomyces cerevisiae</i>  | Nucleus                |
| ATPase synthesis protein 25, mitochondrial inner membrane      | Q6C7D6 | <i>Yarrowia lipolytica</i>       | Mitochondrion          |
| Siderophore biosynthesis regulatory protein URBS1              | P40349 | <i>Ustilago maydis</i>           | Nucleus                |
| Flap endonuclease 1<br>nucleolus                               | A4QS18 | <i>Magnaporthe oryzae</i>        | Nucleus /              |
| RNA-silencing factor ers1                                      | O94717 | <i>Schizosaccharomyces pombe</i> | Cytoplasm              |
| Telomere length regulation protein TEN1<br>region              | Q07921 | <i>Saccharomyces cerevisiae</i>  | Chromosome / telomeric |
| Histone acetyltransferase type B subunit 2                     | Q6FXI8 | <i>Candida glabrata</i>          | Cytoplasm              |

### **Amino acid metabolism**

|                                      |        |                                 |                        |
|--------------------------------------|--------|---------------------------------|------------------------|
| High-affinity glutamine permease     | P48813 | <i>Saccharomyces cerevisiae</i> | Mitochondrion membrane |
| Vacuolar amino acid transporter 3    | P36062 | <i>Saccharomyces cerevisiae</i> | Vacuole membrane       |
| D-3-phosphoglycerate dehydrogenase 2 | P40510 | <i>Saccharomyces cerevisiae</i> | Cytoplasm              |

|                                                   |            |                                  |           |
|---------------------------------------------------|------------|----------------------------------|-----------|
| Glutathione hydrolase<br>Mitochondrion /cytoplasm | W9JMZ4     | <i>Fusarium oxysporum</i>        |           |
| PALP domain-containing protein<br>Mitochondrion   | A0A5C6TN97 | <i>Fusarium oxysporum</i>        |           |
| Glutathione synthetase<br>Nucleus                 | A0A420MCL8 | <i>Fusarium oxysporum</i>        |           |
| Pentafunctional AROM polypeptide<br>Cytoplasm     | A0A2H3TLG9 | <i>Fusarium oxysporum</i>        |           |
| Kynurenine formamidase                            | Q04066     | <i>Saccharomyces cerevisiae</i>  | Cytoplasm |
| Methylthioribose-1-phosphate<br>isomerase         | A7TSA5     | <i>Vanderwaltozyma polyspora</i> | Cytoplasm |
| Thiamine thiazole synthase<br>Cytoplasm           | A7EWL8     | <i>Sclerotinia sclerotiorum</i>  |           |

### **Stress and Defense Response**

|                                                 |        |                                 |                                |
|-------------------------------------------------|--------|---------------------------------|--------------------------------|
| Heat shock protein homolog SSE1                 | P32589 | <i>Saccharomyces cerevisiae</i> | Cytoplasm                      |
| Membrane-anchored lipid-binding<br>protein YSP2 | Q06681 | <i>Saccharomyces cerevisiae</i> | Endoplasmic reticulum membrane |
| Heat shock protein SSA4                         | P22202 | <i>Saccharomyces cerevisiae</i> | Cytoplasm                      |
| 6-methylsalicylic acid synthase                 | P22367 | <i>Penicillium patulum</i>      | Cytoplasm                      |



|                                                       |        |                                  |                          |
|-------------------------------------------------------|--------|----------------------------------|--------------------------|
| Mechanosensitive ion channel<br>membrane protein Msy2 | O14050 | <i>Schizosaccharomyces pombe</i> | Endoplasmic<br>reticulum |
| Protein SIP5                                          | Q759M1 | <i>Ashbya gossypii</i>           | Cytoplasm                |
| Dicer-like protein 2                                  | A1D9Z6 | <i>Neosartorya fischeri</i>      | Cytoplasm                |
| Stress response protein nst1                          | Q7S8V3 | <i>Neurospora crassa</i>         | Cytoplasm                |
| Cytochrome c peroxidase, mitochondrial                | Q6BKY9 | <i>Debaryomyces hansenii</i>     | Mitochondrion            |

### **Transcription regulation**

|              |        |                            |         |
|--------------|--------|----------------------------|---------|
| Protein hir1 | Q0CQ54 | <i>Aspergillus terreus</i> | Nucleus |
|--------------|--------|----------------------------|---------|

### **Other Metabolites**

|                                                                          |            |                                 |                    |
|--------------------------------------------------------------------------|------------|---------------------------------|--------------------|
| Inactive deaminase YBR284W                                               | P38150     | <i>Saccharomyces cerevisiae</i> | Cytoplasm/Membrane |
| Urea amidolyase                                                          | P32528     | <i>Saccharomyces cerevisiae</i> | Cytoplasm          |
| 2,5-diamino-6-ribosylamino-4(3H)<br>-pyrimidinone 5'-phosphate reductase | P33312     | <i>Saccharomyces cerevisiae</i> | Cytoplasm          |
| FAD_binding_3 domain-containing<br>Protein                               | A0A6M7Z3Q6 | <i>Fusarium oxysporum</i>       | Mitochondrion      |
| Adenosylmethionine decarboxylase                                         | W9HY08     | <i>Fusarium oxysporum</i>       | Cytoplasm          |
| Molybdopterine synthase catalytic subunit                                | A2R3H4     | <i>Aspergillus niger</i>        | Cytoplasm          |
| Adenylate cyclase                                                        | P23466     | <i>Lachancea kluyveri</i>       | Nucleus            |

|                                                             |            |                                  |                        |
|-------------------------------------------------------------|------------|----------------------------------|------------------------|
| Hydroxamate-type ferrichrome siderophore peptide synthetase | Q9P7T1     | <i>Schizosaccharomyces pombe</i> | Cytoplasm              |
| 3-ketosteroid 1-dehydrogenase heIE                          | Q4WR24     | <i>Neosartorya fumigata</i>      | Mitochondrion          |
| Folic acid synthesis protein FOL1                           | P53848     | <i>Saccharomyces cerevisiae</i>  | Mitochondrion membrane |
| FAD-dependent monooxygenase sdgC                            | A0A1U8QHS4 | <i>Emericella nidulans</i>       | Membrane               |

### Unknown

|                                                     |            |                                 |               |
|-----------------------------------------------------|------------|---------------------------------|---------------|
| Protein RFS1                                        | P38234     | <i>Saccharomyces cerevisiae</i> | Cytoplasm     |
| PX domain-containing protein YPR097W                | Q06839     | <i>Saccharomyces cerevisiae</i> | Cytoplasm     |
| Protein FMP27, mitochondrial                        | Q06179     | <i>Saccharomyces cerevisiae</i> | Mitochondrion |
| BZIP domain-containing protein                      | A0A6M7Z7J4 | <i>Fusarium oxysporum</i>       | Nucleus       |
| ABC1 domain-containing protein                      | A0A6M7Z9K2 | <i>Fusarium oxysporum</i>       | Nucleus       |
| AMP-binding domain-containing protein               | W9KNE1     | <i>Fusarium oxysporum</i>       | Cytoplasm     |
| Mtf2 domain-containing protein                      | A0A2H3T9L8 | <i>Fusarium oxysporum</i>       | Mitochondrion |
| gag_pre-integr domain-containing protein            | A0A420PAX1 | <i>Fusarium oxysporum</i>       | Nucleus       |
| SCP domain-containing protein<br>Nucleus            | A0A6M7ZUM5 | <i>Fusarium oxysporum</i>       |               |
| HTH APSES-type domain-containing protein<br>Nucleus | W9KJX9     | <i>Fusarium oxysporum</i>       |               |
| Spc7 domain-containing protein<br>Nucleus           | W9LBX5     | <i>Fusarium oxysporum</i>       |               |

|                                                                    |            |                           |
|--------------------------------------------------------------------|------------|---------------------------|
| HET domain-containing protein<br>Nucleus/Cytoplasm                 | X0B8E0     | <i>Fusarium oxysporum</i> |
| Isochorismatase domain-containing protein<br>Cytoplasm             | W9K8Q9     | <i>Fusarium oxysporum</i> |
| 2EXR domain-containing protein<br>Unknown                          | A0A6M7ZEK6 | <i>Fusarium oxysporum</i> |
| DJ-1_PfpI domain-containing protein<br>Unknown                     | A0A6M7YN02 | <i>Fusarium oxysporum</i> |
| Abhydrolase_3 domain-containing protein<br>Cytoplasm               | A0A2H3GEN0 | <i>Fusarium oxysporum</i> |
| Cytochrome b5 heme-binding<br>Nucleus<br>domain-containing protein | A0A420STL5 | <i>Fusarium oxysporum</i> |
| AB hydrolase-1 domain-containing protein<br>Cytoplasm              | W9JP57     | <i>Fusarium oxysporum</i> |
| Homeobox domain-containing protein<br>Nucleus                      | A0A6M7YN32 | <i>Fusarium oxysporum</i> |
| SH3 domain-containing protein<br>Integral component of membrane    | X0IL15     | <i>Fusarium oxysporum</i> |
| FAD-binding PCMH-type<br>Endoplasmic<br>domain-containing protein  | A0A6M7YWV0 | <i>Fusarium oxysporum</i> |
| Deacetylase sirtuin-type<br>Nucleus<br>domain-containing protein   | A0A6M7ZUM4 | <i>Fusarium oxysporum</i> |

|                                                                  |            |                                  |               |
|------------------------------------------------------------------|------------|----------------------------------|---------------|
| NB-ARC domain-containing protein<br>Cytoplasm                    | W9KX17     | <i>Fusarium oxysporum</i>        |               |
| 5'-deoxynucleotidase<br>Cytoplasm / Mitochondrion                | A0A6M7ZG25 | <i>Fusarium oxysporum</i>        |               |
| DNA helicase<br>Nucleus                                          | W9IMG1     | <i>Fusarium oxysporum</i>        |               |
| Dimer_Tnp_hAT domain-containing protein<br>Cytoplasm / nucleus   | A0A8H6GUX8 | <i>Fusarium oxysporum</i>        |               |
| J domain-containing protein<br>Membrane                          | A0A8H5AIT8 | <i>Fusarium oxysporum</i>        |               |
| Maintenance of telomere capping protein 2                        | C5E1C0     | <i>Zygosaccharomyces rouxii</i>  | Unknown       |
| Membrane-bound O-acyltransferase GUP1<br>membrane                | Q7Z888     | <i>Millerozyma farinosa</i>      | Cell          |
| Baeyer-Villiger monooxygenase nsrF                               | A0A2I1C3U2 | <i>Aspergillus novofumigatus</i> | Cytoplasm     |
| Cytochrome P450 monooxygenase 98                                 | F1SY91     | <i>Postia placenta</i>           | Membrane      |
| Altered inheritance of mitochondria<br>protein 41, mitochondrial | A5DKQ3     | <i>Meyerozyma guilliermondii</i> | Mitochondrion |
| Protein PAR32                                                    | Q12515     | <i>Saccharomyces cerevisiae</i>  | Cytoplasm     |
| Nonribosomal peptide synthetase 4<br>reticulum                   | I1RF49     | <i>Gibberella zeae</i>           | Endoplasmic   |
| Sorbose reductase homolog SOU2                                   | P87218     | <i>Candida albicans</i>          | Cytoplasm     |

|                                                    |            |                                   |           |
|----------------------------------------------------|------------|-----------------------------------|-----------|
| pH-response regulator protein palF/RIM8<br>Unknown | Q52FM1     | <i>Magnaporthe oryzae</i>         |           |
| T-complex protein 1 subunit eta                    | Q8SR53     | <i>Encephalitozoon cuniculi</i>   | Cytoplasm |
| Monooxygenase AacuP<br>Cytoplasm                   | A0A1L9WLD7 | <i>Aspergillus aculeatus</i>      |           |
| FK506-binding protein 4                            | G0SC91     | <i>Chaetomium thermophilum</i>    | Nucleus   |
| Topoisomerase I damage affected protein 2          | A7TTT7     | <i>Vanderwaltozyma polyspora</i>  | Cytoplasm |
| Cytochrome P450 monooxygenase orf6                 | A0A068ACU3 | <i>Eupenicillium brefeldianum</i> | Membrane  |
